# Supplementary material for: Highly dispersed Co nanoparticles embedded in a carbon matrix as a robust and efficient Fischer–Tropsch synthesis catalyst under harsh conditions
Source: Royal Society of Chemistry journal article supplement (doi:10.1039/d0cy01424a), 2020-12-15
Supplement: d0cy01424a1.pdf [file d0cy01424a1.pdf]

## Highly Dispersed Co Nanoparticles Embedded in Carbon Matrix as Robust and Efficient Fischer-Tropsch Synthesis Catalyst Under Harsh Condition

Zhe Cai,<sup>ab‡</sup>, Shuai Lyu<sup>c‡</sup>, Yao Chen<sup>d</sup>, Chengchao Liu<sup>c</sup>, Yuhua Zhang<sup>c</sup>, Faquan Yu<sup>a\*</sup>, Jinlin Li<sup>c\*</sup>

a. Key Laboratory for Green Chemical Process of Ministry of Education, Hubei Key Laboratory for Novel Reactor and Green Chemistry Technology, Hubei Engineering Research Center for Advanced Fine Chemicals, and School of Chemical Engineering and Pharmacy, Wuhan Institute of Technology, Wuhan 430205, P. R. China. E-mail: fyu@wit.edu.cn

b. The College of Post and Telecommunication of Wuhan Institute of Technology, Wuhan 430205, P. R. China.

c. Key Laboratory of Catalysis and Materials Science of the State Ethnic Affairs Commission & Ministry of Education, South-Central University for Nationalities, Wuhan 430074, Hubei Province, P.R. China. E-mail: jinlinli@aliyun.com

d. Key Lab for Green Chemical Technology of Ministry of Education, School of Chemical Engineering and Technology, Collaborative Innovation Center of Chemical Science and Engineering (Tianjin), Tianjin University, Tianjin 300072, China.

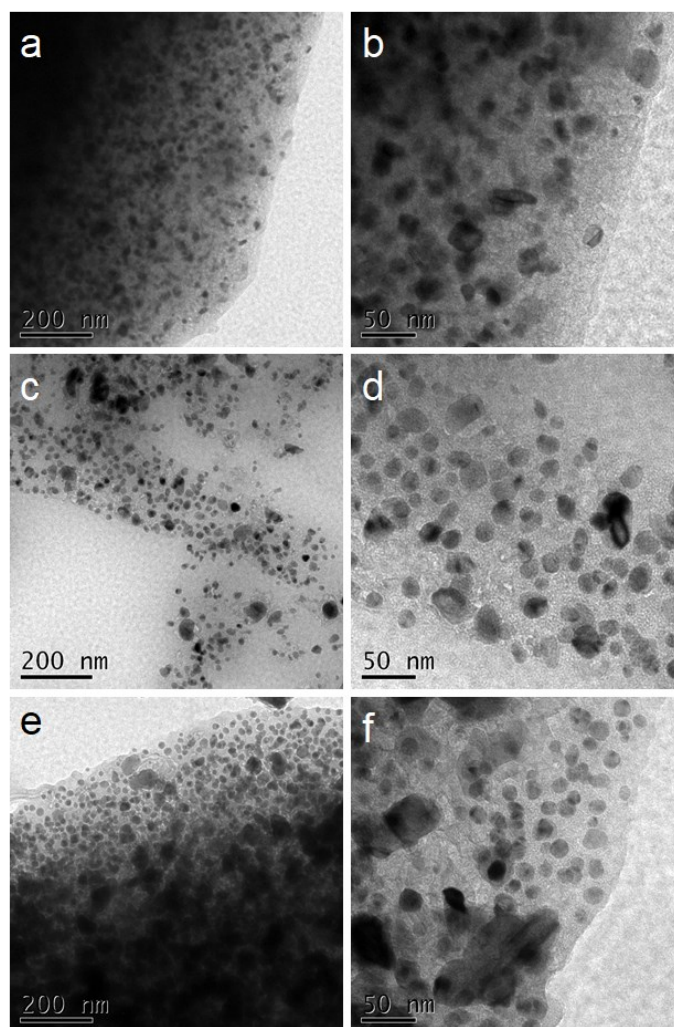

Figure S1 TEM of different Co@C catalysts. a and b: 20-Co@C; c and d: 50-Co@C; e and f: 65-Co@C

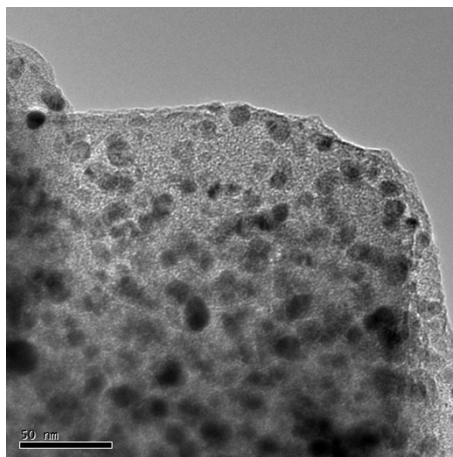

Figure S2 The typical TEM image of MOFs derived Co@C catalyst (Co@C-M).

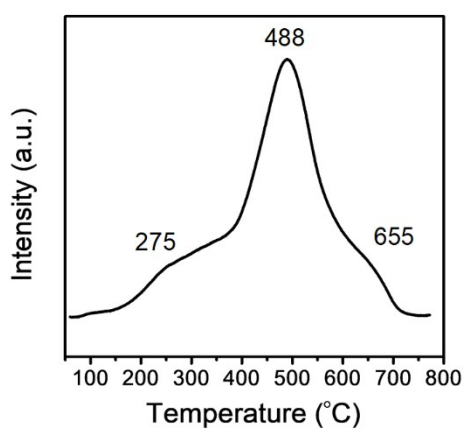

Figure S3 TPR patterns of Co@C-M catalyst.

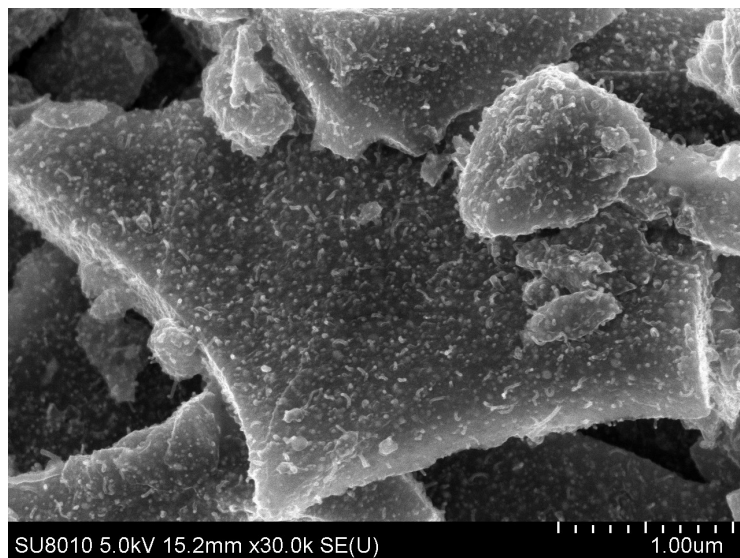

Figure S4 SEM image of 35-Co@C sample.

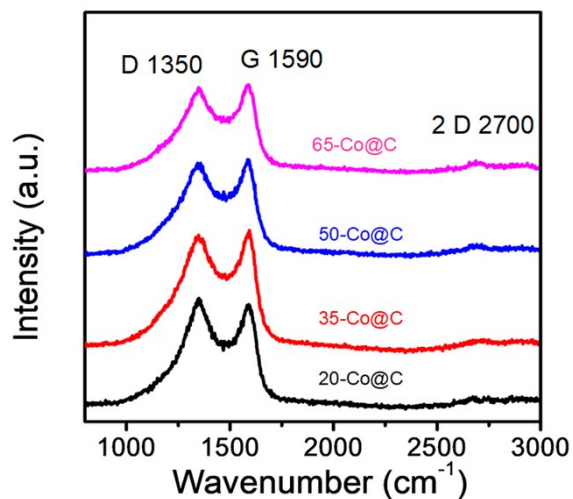

Figure S5 Raman spectrum of different Co@C catalysts.

**Table S1** TG results of different Co catalysts

| Catalyst | Weight Loss (%) | Residual Co <sub>3</sub> O <sub>4</sub> <sup>a</sup> (%) | Co Loading (%) |
|----------|-----------------|----------------------------------------------------------|----------------|
| 20-Co@C  | 72.0            | 28.0                                                     | 20.6           |
| 35-Co@C  | 61.1            | 38.9                                                     | 28.6           |
| 50-Co@C  | 43.1            | 56.9                                                     | 41.8           |
| 65-Co@C  | 40.1            | 59.9                                                     | 44.0           |

a: Co<sub>3</sub>O<sub>4</sub> was assumed as the unique Co species after a 900 °C TG experiment.

**Table S2** Surface compositions of Co@C samples with different Co loading by XPS analysis

| Catalyst             | Co  | C    | O    | Co/C |
|----------------------|-----|------|------|------|
| 20-Co@C              | 0.7 | 89.0 | 10.3 | 0.07 |
| 35-Co@C              | 1.6 | 92.4 | 6.0  | 0.27 |
| 50-Co@C              | 1.6 | 88.4 | 10.0 | 0.16 |
| 65-Co@C              | 2.6 | 89.2 | 8.1  | 0.32 |
| 35-Co@C <sup>a</sup> | 5.1 | 77.5 | 16.4 | 0.31 |

a: Treated in pure H<sub>2</sub> at 450 °C for 10 h before tested.

**Table S3** Catalytic performance of various Co@C catalysts at 260 °C.

| Catalysts | CO<br>Conv.<br>(%) | CO <sub>2</sub><br>Sel.<br>(%) | Hydrocarbon selectivity (%) |                                |                             |
|-----------|--------------------|--------------------------------|-----------------------------|--------------------------------|-----------------------------|
|           |                    |                                | CH <sub>4</sub>             | C <sub>2</sub> -C <sub>4</sub> | C <sub>5</sub> <sup>+</sup> |
| 20-Co@C   | 44.3               | 4.5                            | 26.6                        | 18.7                           | 54.7                        |
| 35-Co@C   | 48.7               | 3.8                            | 27.3                        | 19.5                           | 53.2                        |
| 50-Co@C   | 45.3               | 3.3                            | 25.4                        | 19.8                           | 54.8                        |
| 65-Co@C   | 57.5               | 4.2                            | 27.7                        | 21.5                           | 50.8                        |

CO steady state conversion and hydrocarbon selectivity are collected at 15–40 h.

**Table S4** H<sub>2</sub> -TPD data and TOF value of the Co@C catalysts.

| Catalyst | H <sub>2</sub> desorbed<br>( $\mu\text{mol g}^{-1}$ ) | Dispersity<br>(%) | TOF<br>( $10^{-3}\cdot\text{s}^{-1}$ ) |
|----------|-------------------------------------------------------|-------------------|----------------------------------------|
| 20-Co@C  | 232.2                                                 | 6.84              | 6.1                                    |
| 35-Co@C  | 299.0                                                 | 5.03              | 6.5                                    |
| 50-Co@C  | 219.1                                                 | 2.58              | 8.6                                    |
| 65-Co@C  | 252.8                                                 | 2.29              | 9.6                                    |
